# Supplementary material
Source: MDPI journal article supplement (https://www.mdpi.com/2073-4395/11/4/794)
Supplement: s1 [file s1]

**Combining QTL mapping and gene expression analysis to elucidate the genetic control of ‘crumbly’  
fruit in red raspberry (*Rubus idaeus*)**

Luca M. Scolari\*, Robert D. Hancock, Pete E. Hedley, Jenny Morris, Kay Smith and Julie Graham

The James Hutton Institute, Invergowrie, Dundee, DD25DA, Scotland, United Kingdom

\*corresponding author

**Table S1:** List of 120 microarray probes matching genes located within the three crumbly QTLs and significantly differentially expressed on a stage\*phenotype basis. The two QTLs, cr\_JHI\_1-15 and cr\_JHI\_3-15, previously identified by Graham et al. [1] are located on linkage group 1 and 3 respectively. The third crumbly QTL, cr\_JHI\_3-20, is identified during this work on linkage group 3. For each probe the gene ID of the matched *A. thaliana* gene and the scaffold of the *Rubus* (Glen Moy genome assembly) browser [9] to which the gene is located are reported. In the last column the *A. thaliana* name for each gene and where available a brief description of its function [10] are presented. In the fourth column (i.e. significant interaction effect), the stage/s to which the stage\*phenotype interaction is significant ( $p < 0.001$ ) are reported; the bold lowercase letters correspond to: **a** = only closed bud, **b** = open flower, **c** = green berry, **d** = closed bud and open flower, **e** = closed bud and green berry, **f** = open flower and green berry and **g** = closed bud, open flower and green berry.

| Microarray probe       | <i>A. thaliana</i><br>gene ID | QTL         | scaffold | significant<br>interaction<br>effect | <sup>a</sup> Gene function                                                                                 |
|------------------------|-------------------------------|-------------|----------|--------------------------------------|------------------------------------------------------------------------------------------------------------|
| CUST_1115_P1426541283  | AT4G20960.1                   | cr_JHI_1-15 | 5441     | <b>c</b>                             | Pyrimidine Deaminase, an enzyme catalysing the second step in the riboflavin biosynthesis.                 |
| CUST_22099_P1426541283 | AT5G52240.1                   | cr_JHI_1-15 | 260      | <b>a</b>                             | Membrane Steroid Binding Protein 1, a protein with similarity to progesterone-binding proteins in animals. |
| CUST_25407_P1426541283 | AT5G02790.1                   | cr_JHI_1-15 | 462      | <b>a</b>                             | Glutathione S-transferase family protein.                                                                  |

|                        |             |             |      |   |                                                                                                                              |
|------------------------|-------------|-------------|------|---|------------------------------------------------------------------------------------------------------------------------------|
| CUST_25669_PI426541283 | None        | cr_JHI_1-15 | 3053 | c |                                                                                                                              |
| CUST_27288_PI426541283 | AT4G11740.1 | cr_JHI_1-15 | 2164 | c | SAY1, a novel protein with a small region of similarity to coil-coiled domain of yeast VSP27 protein.                        |
| CUST_30393_PI426541283 | AT1G01770.1 | cr_JHI_1-15 | 353  | c | Propionyl-CoA carboxylase.                                                                                                   |
| CUST_30947_PI426541283 | AT1G03310.2 | cr_JHI_1-15 | 318  | e | Isoamylase 2, a protein with strong similarity to isoamylase but lacks critical residues known to be important for activity. |
| CUST_34519_PI426541283 | AT2G38040.1 | cr_JHI_1-15 | 353  | c | CAC3, carboxyltransferase alpha subunit of acetyl-CoA carboxylase, involved in de novo fatty acid biosynthesis.              |
| CUST_34561_PI426541283 | None        | cr_JHI_1-15 | 552  | c |                                                                                                                              |

|                        |             |             |      |          |                                                                                              |
|------------------------|-------------|-------------|------|----------|----------------------------------------------------------------------------------------------|
| CUST_37235_PI426541283 | AT2G46000.1 | cr_JHI_1-15 | 3053 | <b>f</b> | LDL receptor wingless signalling/trafficking chaperone involved in protein folding.          |
| CUST_41049_PI426541283 | None        | cr_JHI_1-15 | 3407 | <b>b</b> |                                                                                              |
| CUST_41314_PI426541283 | AT2G45990.1 | cr_JHI_1-15 | 3053 | <b>c</b> | ribosomal RNA small subunit methyltransferase G.                                             |
| CUST_46143_PI426541283 | None        | cr_JHI_1-15 | 260  | <b>c</b> |                                                                                              |
| CUST_51115_PI426541283 | ATCG00020.1 | cr_JHI_1-15 | 2451 | <b>c</b> | PSBA, the chlorophyll binding protein D1, a part of the photosystem II reaction centre core. |
| CUST_5360_PI426541283  | None        | cr_JHI_1-15 | 462  | <b>g</b> |                                                                                              |

---

---

|                        |             |             |     |   |                                                                     |
|------------------------|-------------|-------------|-----|---|---------------------------------------------------------------------|
| CUST_10102_P1426541283 | AT1G05280.1 | cr_JHI_3-15 | 4   | e | ERV-F (C)1 provirus ancestral Env polypotein,<br>putative (DUF604). |
| CUST_10197_P1426541283 | AT2G32540.1 | cr_JHI_3-15 | 4   | d | Cellulose Synthase-like B4.                                         |
| CUST_11545_P1426541283 | AT2G04570.1 | cr_JHI_3-15 | 52  | f | OSP1, GDSL-motif<br>esterase/acyltransferase/lipase.                |
| CUST_12005_P1426541283 | AT5G42570.1 | cr_JHI_3-15 | 4   | f | B-cell receptor-associated 31-like protein.                         |
| CUST_12159_P1426541283 | AT2G19130.1 | cr_JHI_3-15 | 858 | c | S-locus lectin protein kinase family protein.                       |
| CUST_12989_P1426541283 | AT5G15180.1 | cr_JHI_3-15 | 4   | c | PRX56, Peroxidase superfamily protein.                              |

|                        |             |             |     |   |                                                                                                                                                        |
|------------------------|-------------|-------------|-----|---|--------------------------------------------------------------------------------------------------------------------------------------------------------|
| CUST_13398_PI426541283 | AT2G04240.1 | cr_JHI_3-15 | 826 | d | XERICO, a small protein with an N-terminal trans-membrane domain and a RING-H2 zinc finger motif located at the C-terminus involved in ABA metabolism. |
| CUST_13557_PI426541283 | AT1G26320.1 | cr_JHI_3-15 | 4   | e | Zinc-binding dehydrogenase family protein.                                                                                                             |
| CUST_13601_PI426541283 | AT5G35840.1 | cr_JHI_3-15 | 76  | e | PHYTOCHROME C, the apoprotein of phytochrome;one of a family of photoreceptors that modulate plant growth and development.                             |
| CUST_14918_PI426541283 | AT5G38690.1 | cr_JHI_3-15 | 43  | e | DDR1, Zinc-finger domain of monoamine-oxidase A repressor R1 protein.                                                                                  |
| CUST_17056_PI426541283 | AT5G14180.1 | cr_JHI_3-15 | 52  | g | MPL1, Myzus persicae-induced lipase 1.                                                                                                                 |
| CUST_17098_PI426541283 | AT4G15240.1 | cr_JHI_3-15 | 4   | f | Glycosyltransferase (DUF604).                                                                                                                          |

|                        |             |             |    |          |                                                                     |
|------------------------|-------------|-------------|----|----------|---------------------------------------------------------------------|
| CUST_17219_PI426541283 | AT3G21610.1 | cr_JHI_3-15 | 4  | <b>c</b> | Acid phosphatase/vanadium-dependent haloperoxidase-related protein. |
| CUST_17686_PI426541283 | none        | cr_JHI_3-15 | 52 | <b>b</b> |                                                                     |
| CUST_18985_PI426541283 | none        | cr_JHI_3-15 | 43 | <b>c</b> |                                                                     |
| CUST_19076_PI426541283 | AT3G21670.1 | cr_JHI_3-15 | 4  | <b>a</b> | NRT1/ PTR FAMILY 6.4, Major facilitator superfamily protein.        |
| CUST_1913_PI426541283  | AT4G13500.1 | cr_JHI_3-15 | 76 | <b>c</b> | Transmembrane protein.                                              |
| CUST_19139_PI426541283 | AT4G05120.1 | cr_JHI_3-15 | 65 | <b>f</b> | Equilibrative Nucleoside Transporter (ENT3).                        |

|                        |             |             |     |          |                                                                                                                                  |
|------------------------|-------------|-------------|-----|----------|----------------------------------------------------------------------------------------------------------------------------------|
| CUST_19325_P1426541283 | AT5G38510.1 | cr_JHI_3-15 | 43  | <b>b</b> | Rhomboid-related intramembrane serine protease family protein.                                                                   |
| CUST_20489_P1426541283 | AT1G11910.1 | cr_JHI_3-15 | 4   | <b>e</b> | Aspartic Proteinase 1 (APA 1).                                                                                                   |
| CUST_20853_P1426541283 | AT5G38530.1 | cr_JHI_3-15 | 43  | <b>b</b> | Tryptophan synthase beta subunit type 2 that catalyses a condensation reaction between serine and indole to generate tryptophan. |
| CUST_21037_P1426541283 | AT5G42570.1 | cr_JHI_3-15 | 4   | <b>b</b> | B-cell receptor-associated 31-like protein.                                                                                      |
| CUST_21963_P1426541283 | AT3G29760.1 | cr_JHI_3-15 | 509 | <b>c</b> | Haloacid dehalogenase-like hydrolase (HAD) superfamily protein.                                                                  |
| CUST_2371_P1426541283  | AT5G08080.3 | cr_JHI_3-15 | 4   | <b>b</b> | Syntaxin of Plants 132 (SYP132).                                                                                                 |



|                        |             |             |     |          |                                                                     |
|------------------------|-------------|-------------|-----|----------|---------------------------------------------------------------------|
| CUST_23715_PI426541283 | none        | cr_JHI_3-15 | 43  | <b>c</b> |                                                                     |
| CUST_24407_PI426541283 | AT5G12210.1 | cr_JHI_3-15 | 734 | <b>b</b> | RAB geranylgeranyl transferase beta subunit 1.                      |
| CUST_24998_PI426541283 | AT3G21710.2 | cr_JHI_3-15 | 4   | <b>a</b> | Vascular-related unknown protein 1 (VUP1), a transmembrane protein. |
| CUST_26242_PI426541283 | AT4G14103.2 | cr_JHI_3-15 | 734 | <b>c</b> | F-box/RNI-like superfamily protein.                                 |
| CUST_26372_PI426541283 | AT4G03260.1 | cr_JHI_3-15 | 858 | <b>b</b> | Microtubule Associated Stress Protein 1 (MASP1).                    |
| CUST_2738_PI426541283  | AT5G15870.1 | cr_JHI_3-15 | 43  | <b>b</b> | Glycosyl hydrolase family 81 protein.                               |

|                               |             |             |       |          |                                                                                                               |
|-------------------------------|-------------|-------------|-------|----------|---------------------------------------------------------------------------------------------------------------|
| <b>CUST_27619_PI426541283</b> | AT4G28240.1 | cr_JHI_3-15 | 65    | <b>c</b> | WIP 1, member of the wound-induced polypeptide (WIP) family.                                                  |
| <b>CUST_2769_PI426541283</b>  | AT3G21760.1 | cr_JHI_3-15 | 10689 | <b>c</b> | HYR1, a UDP glycosyltransferase (UGT).                                                                        |
| <b>CUST_28007_PI426541283</b> | AT3G29770.1 | cr_JHI_3-15 | 509   | <b>c</b> | Methyl Esterase 11, an enzyme protein predicted to act as a carboxylesterase.                                 |
| <b>CUST_28343_PI426541283</b> | AT5G38600.1 | cr_JHI_3-15 | 43    | <b>c</b> | Proline-rich spliceosome-associated (PSP) family protein / zinc knuckle (CCHC-type) family protein.           |
| <b>CUST_28997_PI426541283</b> | AT2G32640.1 | cr_JHI_3-15 | 4     | <b>c</b> | Lycopene beta cyclase that catalyses the addition of beta-ionone end groups to the end of lycopene molecules. |
| <b>CUST_29286_PI426541283</b> | AT2G32250.1 | cr_JHI_3-15 | 835   | <b>b</b> | FAR1-related sequence 2 (FARS2).                                                                              |

|                        |             |             |     |          |                                                                                                                                                                                                                         |
|------------------------|-------------|-------------|-----|----------|-------------------------------------------------------------------------------------------------------------------------------------------------------------------------------------------------------------------------|
| CUST_29379_PI426541283 | AT5G54970.1 | cr_JHI_3-15 | 4   | <b>f</b> | Hypothetical protein.                                                                                                                                                                                                   |
| CUST_30238_PI426541283 | none        | cr_JHI_3-15 | 858 | <b>c</b> |                                                                                                                                                                                                                         |
| CUST_31018_PI426541283 | AT2G04790.2 | cr_JHI_3-15 | 294 | <b>e</b> | PTB domain engulfment adapter.                                                                                                                                                                                          |
| CUST_31157_PI426541283 | none        | cr_JHI_3-15 | 65  | <b>b</b> |                                                                                                                                                                                                                         |
| CUST_33454_PI426541283 | AT1G05180.1 | cr_JHI_3-15 | 4   | <b>e</b> | Auxin Resistant 1.                                                                                                                                                                                                      |
| CUST_33675_PI426541283 | AT5G38470.1 | cr_JHI_3-15 | 182 | <b>g</b> | Radiation sensitive23D (RAD23) proteins play an essential role in the cell cycle, morphology, and fertility of plants through their delivery of UPS (ubiquitin/26S proteasome system) substrates to the 26S proteasome. |

|                        |             |             |     |          |                                                                                                                        |
|------------------------|-------------|-------------|-----|----------|------------------------------------------------------------------------------------------------------------------------|
| CUST_33751_PI426541283 | AT5G36930.2 | cr_JHI_3-15 | 76  | <b>d</b> | Disease resistance protein (TIR-NBS-LRR class) family.                                                                 |
| CUST_34549_PI426541283 | AT4G01575.1 | cr_JHI_3-15 | 294 | <b>b</b> | KPI-2 a putative Kazal-type serine proteinase inhibitor that is highly expressed in seeds, mature roots and flowers.   |
| CUST_34605_PI426541283 | AT5G16970.1 | cr_JHI_3-15 | 4   | <b>c</b> | AER, a 2-alkenal reductase that plays a key role in the detoxification of reactive carbonyls.                          |
| CUST_34852_PI426541283 | AT1G03560.1 | cr_JHI_3-15 | 263 | <b>c</b> | Pentatricopeptide repeat (PPR-like) superfamily protein.                                                               |
| CUST_35039_PI426541283 | AT3G21630.1 | cr_JHI_3-15 | 76  | <b>b</b> | Chitin Elicitor Receptor Kinase 1, Involved in the perception and transduction of the chitin oligosaccharide elicitor. |
| CUST_35767_PI426541283 | AT2G32970.2 | cr_JHI_3-15 | 52  | <b>b</b> | G1/S-specific cyclin-E protein.                                                                                        |

|                        |             |             |     |          |                                                                                                           |
|------------------------|-------------|-------------|-----|----------|-----------------------------------------------------------------------------------------------------------|
| CUST_35866_P1426541283 | AT4G28210.1 | cr_JHI_3-15 | 65  | <b>f</b> | Embryo defective 1923.                                                                                    |
| CUST_36166_P1426541283 | AT3G04090.1 | cr_JHI_3-15 | 4   | <b>g</b> | Small and basic intrinsic protein 1A, a family of plant aquaporins located on endoplasmic reticulum (ER). |
| CUST_3643_P1426541283  | AT5G15950.1 | cr_JHI_3-15 | 43  | <b>b</b> | SAMDC2, adenosylmethionine decarboxylase family protein.                                                  |
| CUST_36601_P1426541283 | none        | cr_JHI_3-15 | 4   | <b>d</b> |                                                                                                           |
| CUST_37835_P1426541283 | AT1G30330.2 | cr_JHI_3-15 | 664 | <b>b</b> | Auxin Response Factor 6 (ARF6).                                                                           |
| CUST_38020_P1426541283 | AT4G15417.1 | cr_JHI_3-15 | 4   | <b>d</b> | RTL1, a RNase II-like 1 protein.                                                                          |

|                        |             |             |    |          |                                                                                                                   |
|------------------------|-------------|-------------|----|----------|-------------------------------------------------------------------------------------------------------------------|
| CUST_38488_PI426541283 | none        | cr_JHI_3-15 | 52 | <b>g</b> |                                                                                                                   |
| CUST_38657_PI426541283 | AT2G46410.1 | cr_JHI_3-15 | 4  | <b>c</b> | CAPRICE, Nuclear-localized R3-type MYB transcription factor.                                                      |
| CUST_39870_PI426541283 | none        | cr_JHI_3-15 | 43 | <b>f</b> |                                                                                                                   |
| CUST_39944_PI426541283 | AT3G22060.1 | cr_JHI_3-15 | 4  | <b>a</b> | Protein with Pfam profile: PF01657 Domain of unknown function.                                                    |
| CUST_43180_PI426541283 | AT1G05200.1 | cr_JHI_3-15 | 4  | <b>c</b> | Glutamate receptor 3.4, a putative glutamate receptor GLR3 with dual localization in plastid and plasma membrane. |
| CUST_44276_PI426541283 | AT1G05030.1 | cr_JHI_3-15 | 4  | <b>a</b> | Major facilitator superfamily protein.                                                                            |

|                               |             |             |     |          |                                                                                                                       |
|-------------------------------|-------------|-------------|-----|----------|-----------------------------------------------------------------------------------------------------------------------|
| <b>CUST_44285_PI426541283</b> | AT4G10270.1 | cr_JHI_3-15 | 65  | <b>a</b> | WIP4, Member of the wound-induced polypeptide (WIP) family.                                                           |
| <b>CUST_45148_PI426541283</b> | AT1G61900.1 | cr_JHI_3-15 | 4   | <b>c</b> | Hypothetical protein.                                                                                                 |
| <b>CUST_45239_PI426541283</b> | AT1G22900.1 | cr_JHI_3-15 | 4   | <b>a</b> | Disease resistance-responsive (dirigent-like protein) family protein.                                                 |
| <b>CUST_45845_PI426541283</b> | AT4G28230.1 | cr_JHI_3-15 | 65  | <b>c</b> | Hypothetical protein.                                                                                                 |
| <b>CUST_45962_PI426541283</b> | AT1G06570.1 | cr_JHI_3-15 | 676 | <b>f</b> | Phytoene desaturation 1 (PDS 1), enzyme involved in the biosynthesis of both plastoquinone and tocopherols in plants. |
| <b>CUST_46865_PI426541283</b> | AT2G04270.5 | cr_JHI_3-15 | 826 | <b>b</b> | RNASE E, a ribonuclease located in the chloroplast and is involved in its development.                                |

|                        |             |             |     |          |                                                                                                                                                |
|------------------------|-------------|-------------|-----|----------|------------------------------------------------------------------------------------------------------------------------------------------------|
| CUST_47338_P1426541283 | AT3G30841.1 | cr_JHI_3-15 | 43  | <b>a</b> | Cofactor-independent phosphoglycerate mutase.                                                                                                  |
| CUST_47982_P1426541283 | none        | cr_JHI_3-15 | 76  | <b>a</b> |                                                                                                                                                |
| CUST_51233_P1426541283 | AT3G15850.1 | cr_JHI_3-15 | 52  | <b>c</b> | Fatty Acid Desaturase B (JB67), a chloroplastic enzyme responsible for the synthesis of 16:1 fatty acids from galactolipids and sulpholipids.  |
| CUST_51593_P1426541283 | AT2G05810.1 | cr_JHI_3-15 | 52  | <b>a</b> | ARM repeat superfamily protein.                                                                                                                |
| CUST_51688_P1426541283 | AT2G20890.1 | cr_JHI_3-15 | 65  | <b>e</b> | Thylakoid Formation1, a chloroplast-localized Thylakoid formation1 gene product involved in vesicle-mediated formation of thylakoid membranes. |
| CUST_52187_P1426541283 | AT5G48150.1 | cr_JHI_3-15 | 162 | <b>f</b> | Phytochrome A signal transduction 1.                                                                                                           |



|                        |             |             |      |          |                                                                                                                                                                                                                               |
|------------------------|-------------|-------------|------|----------|-------------------------------------------------------------------------------------------------------------------------------------------------------------------------------------------------------------------------------|
| CUST_52902_PI426541283 | AT1G05120.1 | cr_JHI_3-15 | 4    | <b>b</b> | Helicase protein with RING/U-box domain-containing protein.                                                                                                                                                                   |
| CUST_5304_PI426541283  | AT5G38640.1 | cr_JHI_3-15 | 43   | <b>b</b> | NagB/RpiA/CoA transferase-like superfamily protein.                                                                                                                                                                           |
| CUST_5432_PI426541283  | AT3G22220.1 | cr_JHI_3-15 | 2858 | <b>3</b> | hAT transposon superfamily.                                                                                                                                                                                                   |
| CUST_54460_PI426541283 | AT1G62360.1 | cr_JHI_3-15 | 4    | <b>e</b> | Shoot Meristemless (STM), class I knotted-like homeodomain protein that is required for shoot apical meristem (SAM) formation during embryogenesis and for SAM function throughout the lifetime of the plant.                 |
| CUST_6848_PI426541283  | AT4G26840.1 | cr_JHI_3-15 | 52   | <b>d</b> | SUMO 1, a small ubiquitin-like modifier (SUMO). polypeptide that becomes covalently attached to various intracellular protein targets, much like ubiquitination, leading to post-translational modification of those targets. |
| CUST_8109_PI426541283  | AT1G68590.1 | cr_JHI_3-15 | 182  | <b>e</b> | PSRP3/1, a ribosomal protein PSRP-3/Ycf65.                                                                                                                                                                                    |

---

---

|                        |             |             |      |   |                                                                                                     |
|------------------------|-------------|-------------|------|---|-----------------------------------------------------------------------------------------------------|
| CUST_10154_PI426541283 | AT3G63440.1 | cr_JHI_3_20 | 1500 | e | Cytokinin oxidase/dehydrogenase 6, the enzyme catalyses the degradation of cytokinins.              |
| CUST_1076_PI426541283  | AT3G14460.1 | cr_JHI_3_20 | 419  | g | LRRAC1, a leucine rich repeat protein that also contains an adenylate cyclase catalytic core motif. |
| CUST_1418_PI426541283  | AT5G43822.1 | cr_JHI_3_20 | 419  | c | OPENER, an essential protein of unknown function.                                                   |
| CUST_27324_PI426541283 | AT3G63440.1 | cr_JHI_3_20 | 1500 | e | Cytokinin oxidase/dehydrogenase 6, the enzyme catalyses the degradation of cytokinins.              |
| CUST_16284_PI426541283 | AT2G41700.1 | cr_JHI_3_20 | 79   | e | ATP-binding cassette A1.                                                                            |
| CUST_17728_PI426541283 | none        | cr_JHI_3_20 | 6951 | b |                                                                                                     |

|                        |             |             |      |          |                                                              |
|------------------------|-------------|-------------|------|----------|--------------------------------------------------------------|
| CUST_19120_P1426541283 | none        | cr_JHI_3_20 | 567  | <b>f</b> |                                                              |
| CUST_2016_P1426541283  | AT5G06750.1 | cr_JHI_3_20 | 3486 | <b>c</b> | Arabidopsis PP2C CLADE D 8, a phosphatase 2C family protein. |
| CUST_20312_P1426541283 | AT3G55600.1 | cr_JHI_3_20 | 874  | <b>e</b> | Membrane fusion protein Use1.                                |
| CUST_21749_P1426541283 | none        | cr_JHI_3_20 | 1541 | <b>a</b> |                                                              |
| CUST_26373_P1426541283 | AT2G21540.1 | cr_JHI_3_20 | 499  | <b>b</b> | SEC14-like 3 protein.                                        |
| CUST_26573_P1426541283 | none        | cr_JHI_3_20 | 1541 | <b>a</b> |                                                              |

|                        |             |             |       |          |                                                                                                                                               |
|------------------------|-------------|-------------|-------|----------|-----------------------------------------------------------------------------------------------------------------------------------------------|
| CUST_27462_PI426541283 | none        | cr_JHI_3_20 | 2505  | <b>g</b> |                                                                                                                                               |
| CUST_28494_PI426541283 | AT2G41900.1 | cr_JHI_3_20 | 419   | <b>a</b> | Tandem zinc finger protein 7 (TZF7).                                                                                                          |
| CUST_30381_PI426541283 | AT3G16250.1 | cr_JHI_3_20 | 377   | <b>e</b> | NDF4, a novel subunit of the chloroplast NAD(P)H dehydrogenase complex, involved in cyclic electron flow around photosystem I to produce ATP. |
| CUST_30711_PI426541283 | AT1G68030.1 | cr_JHI_3_20 | 10179 | <b>c</b> | RING/FYVE/PHD zinc finger superfamily protein.                                                                                                |
| CUST_33239_PI426541283 | AT5G06860.1 | cr_JHI_3_20 | 4005  | <b>e</b> | PGIP1, a polygalacturonase inhibiting protein involved in defense response.                                                                   |
| CUST_38171_PI426541283 | AT3G57540.1 | cr_JHI_3_20 | 419   | <b>a</b> | REM4.1, a remorin family protein.                                                                                                             |

|                        |             |             |       |          |                                                                                                                                                                                                                       |
|------------------------|-------------|-------------|-------|----------|-----------------------------------------------------------------------------------------------------------------------------------------------------------------------------------------------------------------------|
| CUST_40106_P1426541283 | AT1G03780.3 | cr_JHI_3_20 | 1094  | <b>e</b> | Targeting protein for XKLP2, has three domains involved in nuclear targeting, one in nuclear export and two in microtubule binding. Involved in mitotic spindle assembly during late prophase and early prometaphase. |
| CUST_42366_P1426541283 | AT3G29240.1 | cr_JHI_3_20 | 874   | <b>c</b> | PPR containing protein (DUF179).                                                                                                                                                                                      |
| CUST_42627_P1426541283 | none        | cr_JHI_3_20 | 3006  | <b>g</b> |                                                                                                                                                                                                                       |
| CUST_4327_P1426541283  | AT5G17000.1 | cr_JHI_3_20 | 10179 | <b>f</b> | Zinc-binding dehydrogenase family protein.                                                                                                                                                                            |
| CUST_43612_P1426541283 | none        | cr_JHI_3_20 | 2505  | <b>b</b> |                                                                                                                                                                                                                       |
| CUST_44619_P1426541283 | AT3G12110.1 | cr_JHI_3_20 | 3486  | <b>e</b> | ACTIN-11, an actin that is expressed predominantly during reproductive development.                                                                                                                                   |

|                               |             |             |      |          |                                                |
|-------------------------------|-------------|-------------|------|----------|------------------------------------------------|
| <b>CUST_46278_PI426541283</b> | AT4G34670.1 | cr_JHI_3_20 | 874  | <b>b</b> | Ribosomal protein S3Ae.                        |
| <b>CUST_46771_PI426541283</b> | AT4G19860.1 | cr_JHI_3_20 | 73   | <b>c</b> | Cytosolic calcium-independent phospholipase A. |
| <b>CUST_561_PI426541283</b>   | AT1G53050.1 | cr_JHI_3_20 | 4488 | <b>e</b> | Protein kinase superfamily protein.            |

---

<sup>a</sup>source The Arabidopsis Information Resource TAIR [10]

## linkage group 1

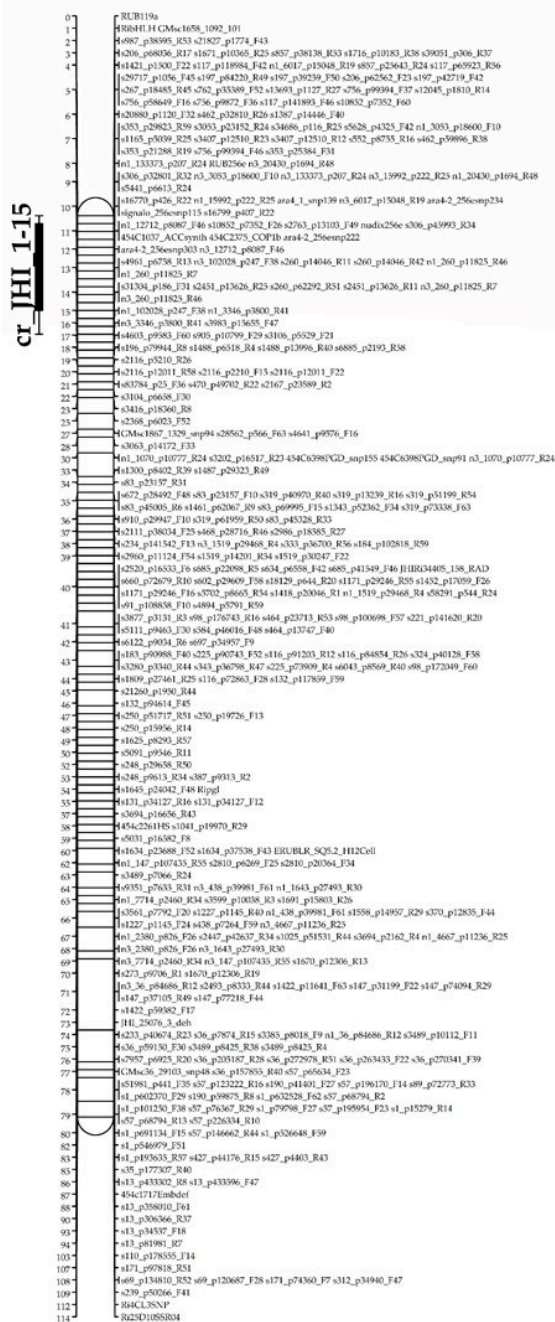

## linkage group 3

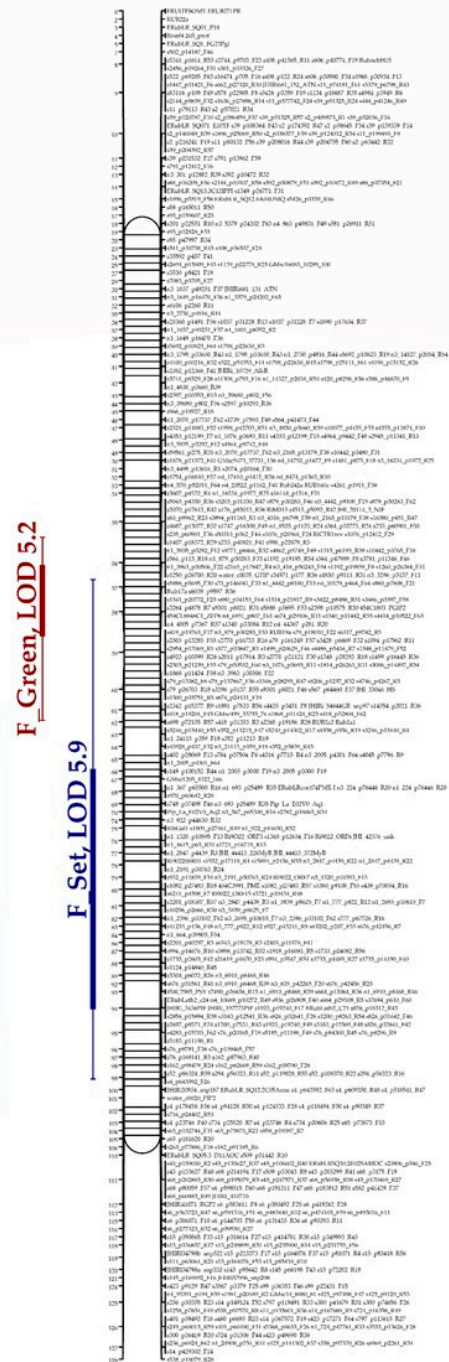

**Figure S1.** Genotype by Sequencing (GbS) linkage maps for linkage groups 1 and 3 of the Glen Moy x Latham mapping population [4]. Bars and whiskers (to the left of the chromosome) show one- and two-LOD support intervals for QTL locations. The linkage group 1 shows a crumbly fruit QTL in black colour (cr\_JHI\_1-15 with LOD 6.1 and with 1-12 cM and 0-15 cM of one and two LOD supporting intervals). The linkage group 3 shows two crumbly fruit QTLs, one in red (cr\_JHI\_3-20 with LOD 6.3 and with 52-60 cM and 50-64 of one and two LOD supporting intervals) and one in green (cr\_JHI\_3-15 with LOD 6.0 and 106-112 cM and 93-118 of one and two LOD supporting intervals) colour, and three fruit ripening QTLs (i.e. fruit set, green fruit), in blue, purple red and pink respectively.
